# Supplementary material for: The FurA regulon in Anabaena sp. PCC 7120: in silico prediction and experimental validation of novel target genes
Source: PubMed Central journal article supplement (PMC4005646; doi:10.1093/nar/gku123), 2014-02-06
Supplement: supp_gku123_nar-02945-v-2013-File007.pdf [file supp_gku123_nar-02945-v-2013-File007.pdf]

**Table S1.** Oligonucleotides used in this study

| <b>Primer</b>   | <b>Sequence 5' - 3'</b>        |
|-----------------|--------------------------------|
| <i>EMSA</i>     |                                |
| Pall2586_up     | GCCGTGCCATCTTTGGCATAG          |
| Pall2586_dw     | CATTATCTCCTAGTTAATTG           |
| PznuA_up        | GGGTTAACCAGCCAATACTTCC         |
| PznuA_dw        | CTGATGTGAGTCCAAATCACGG         |
| Palr0990_up     | CTATCCGATGGGAGTTGATTATG        |
| Palr0990_dw     | GATGTTAGTAGTAGCAGACTTACCC      |
| PcyaD_up        | CTCAGTATCTAAATTTAGATAATGCTCATG |
| PcyaD_dw        | GGGTGTAATATATGTATCCTGGCAGATG   |
| PaphC_up        | GAAGACACGATGTTAAGCGTG          |
| PaphC_dw        | GATTGAGACTAACCTGAGAATTTGG      |
| Pasr_up         | GCTCCGTGATGGGATAAGCAC          |
| Pasr_dw         | GACTCTCCAAATTCATAGGGC          |
| PcyaC_up        | CCCTAATTGCTGTCCTCTTACTC        |
| PcyaC_dw        | GGTTGTCTGGCTCATCATCAAC         |
| asr4775-1       | CGCTCAACCACTCGTCCAC            |
| asr4775-2       | CAACTGTAGGACTCCATTCC           |
| all4003-1       | CGTGCAGTAATGACAGAGAG           |
| all4003-2       | CACAGCGATGCTCGTCATC            |
| alr0950-1       | CATTACCGACCCATCTCCAC           |
| alr0950-2       | GTAATGTCCAGATTGAACTTGG         |
| P2-ndhF_up      | GCGAGGAGTGTTTCAGAGGC           |
| P2-ndhF_dw      | GGCACACACCAACTTGTTGC           |
| PhetC distal_up | GCTACTAGAAATGAGGAGAGGG         |
| PhetC distal_dw | GTGAGCAACATCGACATCTG           |
| Palr1728_up     | CAGTTTTAATGAATACCCAATAAG       |
| Palr1728_dw     | CCTCATTGTGACAAGTATTCTCAC       |
| PpatA_up        | GGTTTGAGCCAATAACTATACGTG       |
| PpatA_dw        | GTAATCGGAAGTGTTTTTCATGG        |
| P2asr1734_up    | GATTTTACTTTTGATAAAATTGCTC      |
| P2asr1734_dw    | CGAAGATTGAATCTTCCTGTGTC        |
| Pflv3a_up       | CCTTTTCCTCGCTTCCCCTTC          |
| Pflv3a_dw       | CTCGGTGAGTGCTACCATAACTCTC      |

|             |                           |
|-------------|---------------------------|
| Palr0240_up | CTTGATACTGTAGCTCAACGCC    |
| Palr0240_dw | CCAGTGCTTGAGAACCTTGTCC    |
| PpbpH_up    | CGCATTGGTATGCTATGACC      |
| PpbpH_dw    | GGCGATTTCACTTCCTCACTTG    |
| PxseA_up    | GAATCGCCAGAAGCAGACAAATG   |
| PxseA_dw    | CAAGTCTATCCAAATCGTAGCATTG |
| Pall4465_up | CGTAATGGAGTCGGCAATTTG     |
| Pall4465_dw | CGTGGACAAATCCTACGC        |
| PfurA_up    | CTCGCCTAGCAATTTAACAAC     |
| PfurA_dw    | GCCTTGAGCGAAGTATTTGTC     |
| PisiA_up    | CAGATTGTCTGTTGAGACTG      |
| PisiA_dw    | GCTACGTGTGCGCCGATG        |
| PsodA_up    | GATAGAATCAATGACTGCTC      |
| PsodA_dw    | GTTGTTGCCTCTTATTTG        |
| PsodB_up    | GCTTAGTAGTCCCTTTGC        |
| PsodB_dw    | CATTTTGTGAAGTCCTCTC       |
| PnifJ_up    | GCCTACTCTGCGAGTTCTCCG     |
| PnifJ_dw    | GGCCTGTGAGAGTTGCTGCAC     |

*RT-PCR*

|               |                           |
|---------------|---------------------------|
| all2586-RT_up | GAATCCTTTATCACCTTTGATG    |
| all2586-RT_dw | CACCCAAGCAGTCTGTTGAC      |
| znuA-RT_up    | GTTGTCCATGACGGTTGGTTG     |
| znuA-RT_dw    | GCCTCAGCATTAGCTTGATAGG    |
| amt4-RT_up    | GCGGTAGATACTCCTACCCTAGA   |
| amt4-RT_dw    | GCCTAACCAACCATTGGAG       |
| cyaD-RT_up    | CGAGATGTGTTCAACAATTGGTCG  |
| cyaD-RT_dw    | GCTGAGTTCTTCTTCACCATCTC   |
| aphC-RT_up    | CCGTTTGGAACGACACCTAC      |
| aphC-RT_dw    | CACTAGGGTTGGGTAATTCTTGC   |
| asr-RT_up     | CCAGTACGAATACCTTGTGGCG    |
| asr-RT_dw     | GGGTAGCCTATCCAAAGCACTG    |
| cyaC-RT_up    | GCACGCTGCGTCAAGAGTC       |
| cyaC-RT_dw    | GCTGTTGTAATGGTATTGATCAAGG |
| psaK-RT_up    | CCTTACTCGCTGCTGCAAC       |
| psaK-RT_dw    | GATTCTGCCTAGATTATGCAATCC  |

|               |                              |
|---------------|------------------------------|
| all4003-RT_up | GCCCGTTTCCAGACATCAC          |
| all4003-RT_dw | CCACCAACCAAGTCTTCGAG         |
| all1127-RT_up | CCCTACGACACCTTAATTGTGC       |
| all1127-RT_dw | GCCCATATAACAGTCTTGGAGG       |
| coxB-RT_up    | CAATGATGACCGTTTCCGC          |
| coxB-RT_dw    | CACCAGTGGTGATACCTGACTCAG     |
| ndhF-RT_up    | GCGTTGGAACTCTCACCTG          |
| ndhF-RT_dw    | GCAACCACCAGTGAGTTCCG         |
| flv3a-RT_up   | GCTAATCAATCCCACAGAGATC       |
| flv3a-RT_dw   | GCTAGGCGATCGCTATACCC         |
| alr0240-RT_up | CGGACAAGGTTCTCAAGCACTG       |
| alr0240-RT_dw | CTCTACAGCAGCCGTATTCATG       |
| pbpH-RT_up    | CGCAACGTCGTACTIONCGTC        |
| pbpH-RT_dw    | GACCCCAATACACTTGATTGAG       |
| xseA-RT_up    | CACTTCAAGATCCTGATGGTTCCG     |
| xseA-RT_dw    | CGTCGGTGTATGCACACAAACATC     |
| all4465-RT_up | CCAAGCTTCTATCGAACGGG         |
| all4465-RT_dw | CCAGCATCATTAAATAGATTTAGCG    |
| FurA_up       | CGGGATCCATGACTGTCTACACAAATAC |
| FurA-5last_dw | ACGCGTCGACCTAACGTTGGCACTTGGG |
| IsiA_up       | CTGCTCTGACAACCCTCTGG         |
| IsiA_dw       | CAGCTAACTTGACTGTATCGGC       |
| rnpB_up       | AGGGAGAGAGTAGGCGTTG          |
| rnpB_dw       | AAAAGAGGAGAGAGTTGGTGG        |
| hetC-RT_up    | GGATTTGGCAAGAGCGATCG         |
| hetC-RT_dw    | CCACCTCAACGGGCGCTTC          |
| alr1728-RT_up | GCTGTGGTTCGTCCCGTTGCTTC      |
| alr1728-RT_dw | GCTTTGAGTAATTCTTCCATTAAGC    |
| patA-RT_up    | CTGGGAAGACAATCACTGGTTGTC     |
| patA-RT_dw    | GATATCTGGCTTTGTACAGAGAATTTC  |
| asr1734-RT_up | GAACTCGAAAGCATTACCACGG       |
| asr1734-RT_dw | GAAGGCAATTATGTTAGTGAATTTC    |

---

**Table S3.** Relative induction ratios of selected FurA predicted targets under different experimental conditions, as result of semi-quantitative RT-PCR analyses<sup>a</sup>

| ORF ID <sup>b</sup> | Gene symbol <sup>b</sup> | Protein description <sup>b</sup>              | WT <sub>(-Fe)</sub> / WT <sub>(+Fe)</sub> | FurA <sup>+</sup> <sub>(+Fe)</sub> / WT <sub>(+Fe)</sub> | FurA <sup>+</sup> <sub>(-Fe)</sub> / WT <sub>(+Fe)</sub> | FurA <sup>+</sup> <sub>(-Fe)</sub> / FurA <sup>+</sup> <sub>(+Fe)</sub> |
|---------------------|--------------------------|-----------------------------------------------|-------------------------------------------|----------------------------------------------------------|----------------------------------------------------------|-------------------------------------------------------------------------|
| <i>all1691</i>      | <i>furA</i>              | Ferric uptake regulator,                      | 4.52 ± 0.15                               | 30.21 ± 1.15                                             | 29.17 ± 1.12                                             | 0.94 ± 0.09                                                             |
| <i>all4001</i>      | <i>isiA</i>              | Flavodoxin, iron-stress induced protein       | 35.12 ± 1.35                              | 1.01 ± 0.03                                              | 36.23 ± 1.17                                             | 35.62 ± 1.12                                                            |
| <i>all2586</i>      |                          | Iron (III) dicitrate ABC transporter permease | 38.58 ± 1.09                              | 1.25 ± 0.27                                              | 20.14 ± 0.93                                             | 15.23 ± 0.86                                                            |
| <i>all0833</i>      | <i>znuA</i>              | Periplasmic binding protein ABC transporter   | 0.45 ± 0.06                               | 0.17 ± 0.02                                              | 0.49 ± 0.08                                              | 3.12 ± 0.14                                                             |
| <i>alr0990</i>      | <i>amt4</i>              | Ammonium transporter                          | 0.32 ± 0.08                               | 2.81 ± 0.23                                              | 0.72 ± 0.11                                              | 0.29 ± 0.07                                                             |
| <i>all0743</i>      | <i>cyaD</i>              | Adenylate cyclase                             | 0.95 ± 0.12                               | 0.09 ± 0.02                                              | 0.15 ± 0.04                                              | 1.42 ± 0.09                                                             |
| <i>all2699</i>      | <i>aphC</i>              | Two-component sensor histidine kinase         | 0.67 ± 0.09                               | 0.07 ± 0.01                                              | 0.12 ± 0.01                                              | 1.56 ± 0.06                                                             |
| <i>alr3165</i>      | <i>asr</i>               | Bacteriorhodopsin                             | 23.12 ± 1.02                              | 0.02 ± 0.01                                              | 33.8 ± 1.06                                              | 52.45 ± 1.12                                                            |
| <i>all4963</i>      | <i>cyaC</i>              | Adenylate cyclase                             | 1.30 ± 0.15                               | 0.23 ± 0.04                                              | 0.64 ± 0.09                                              | 2.57 ± 0.16                                                             |
| <i>asr4775</i>      | <i>psaK</i>              | Photosystem I subunit PsaK                    | 0.36 ± 0.09                               | 2.13 ± 0.06                                              | 0.62 ± 0.07                                              | 0.41 ± 0.05                                                             |
| <i>all4003</i>      |                          | Photosystem II CP43 protein PsbC homolog      | 1.14 ± 0.16                               | 0.72 ± 0.04                                              | 0.43 ± 0.07                                              | 0.68 ± 0.06                                                             |
| <i>all1127</i>      |                          | NADH dehydrogenase                            | 1.43 ± 0.12                               | 0.89 ± 0.09                                              | 0.66 ± 0.08                                              | 0.72 ± 0.05                                                             |
| <i>alr0950</i>      | <i>coxB</i>              | Cytochrome <i>c</i> oxidase subunit II        | 2.35 ± 0.21                               | 0.51 ± 0.08                                              | 0.59 ± 0.06                                              | 1.23 ± 0.08                                                             |
| <i>alr0869</i>      | <i>ndhF</i>              | NADH dehydrogenase subunit 5                  | 1.47 ± 0.15                               | 0.72 ± 0.03                                              | 1.18 ± 0.07                                              | 1.67 ± 0.06                                                             |
| <i>all3895</i>      | <i>flv3a</i>             | Flavodiiron protein Flv3                      | 1.21 ± 0.08                               | 0.34 ± 0.05                                              | 0.87 ± 0.11                                              | 2.39 ± 0.08                                                             |
| <i>alr0240</i>      |                          | Malonyl coenzyme A-acyl transacylase          | 0.36 ± 0.06                               | 0.45 ± 0.06                                              | 0.29 ± 0.04                                              | 0.78 ± 0.05                                                             |
| <i>all2981</i>      | <i>pbpH</i>              | Penicillin-binding protein                    | 0.82 ± 0.07                               | 0.31 ± 0.06                                              | 0.43 ± 0.08                                              | 1.42 ± 0.06                                                             |
| <i>all1774</i>      | <i>xseA</i>              | Exodeoxyribonuclease VII large subunit        | 1.11 ± 0.05                               | 0.47 ± 0.08                                              | 1.26 ± 0.04                                              | 2.83 ± 0.11                                                             |
| <i>all4465</i>      |                          | Transposase                                   | 1.51 ± 0.09                               | 0.93 ± 0.03                                              | 0.89 ± 0.06                                              | 0.92 ± 0.04                                                             |

<sup>a</sup>Signal assigned to each gene corresponded to the intensity of DNA band in the agarose gel stained with ethidium bromide, normalized to the signal observed for housekeeping gene *rnpB* in each condition. Values are means of three independent determination ± SD.

<sup>b</sup>Open reading frame identification, gene symbol and protein description according to the cyanobacterial genomes database CyanoBase (<http://genome.kazusa.or.jp/cyanobase>).

**Table S4.** Relative induction ratios of several FurA predicted targets involved in heterocyst differentiation at different times after nitrogen step-down, as result of semi-quantitative RT-PCR analyses<sup>a</sup>

| ORF ID <sup>b</sup> | Gene symbol <sup>b</sup> | Protein description <sup>b</sup>              | FurA <sup>+</sup> / WT <sup>c</sup> |             |             |
|---------------------|--------------------------|-----------------------------------------------|-------------------------------------|-------------|-------------|
|                     |                          |                                               | 0 h                                 | 11 h        | 21 h        |
| <i>alr2817</i>      | <i>hetC</i>              | Heterocyst differentiation protein            | 1.37 ± 0.11                         | 1.64 ± 0.07 | 2.46 ± 0.12 |
| <i>alr1728</i>      |                          | Fox gene with unknown function                | 2.72 ± 0.08                         | 3.96 ± 0.10 | 3.12 ± 0.17 |
| <i>all0521</i>      | <i>patA</i>              | Heterocyst pattern formation regulator        | 1.27 ± 0.04                         | 1.59 ± 0.04 | 3.28 ± 0.09 |
| <i>asr1734</i>      |                          | Heterocyst differentiation negative regulator | 1.21 ± 0.06                         | 1.17 ± 0.03 | 1.13 ± 0.02 |

<sup>a</sup>Signal assigned to each gene corresponded to the intensity of DNA band in the agarose gel stained with ethidium bromide, normalized to the signal observed for housekeeping gene *rnpB* in each condition. Values are means of three independent determination ± SD.

<sup>b</sup>Open reading frame identification, gene symbol and protein description according to the cyanobacterial genomes database CyanoBase (<http://genome.kazusa.or.jp/cyanobase>).

<sup>c</sup>Both strains were grown by triplicate in BG-11 medium to mid-log phase, washed with BG-11<sub>0</sub> and resuspended in the same nitrogen free medium to induce heterocyst differentiation.

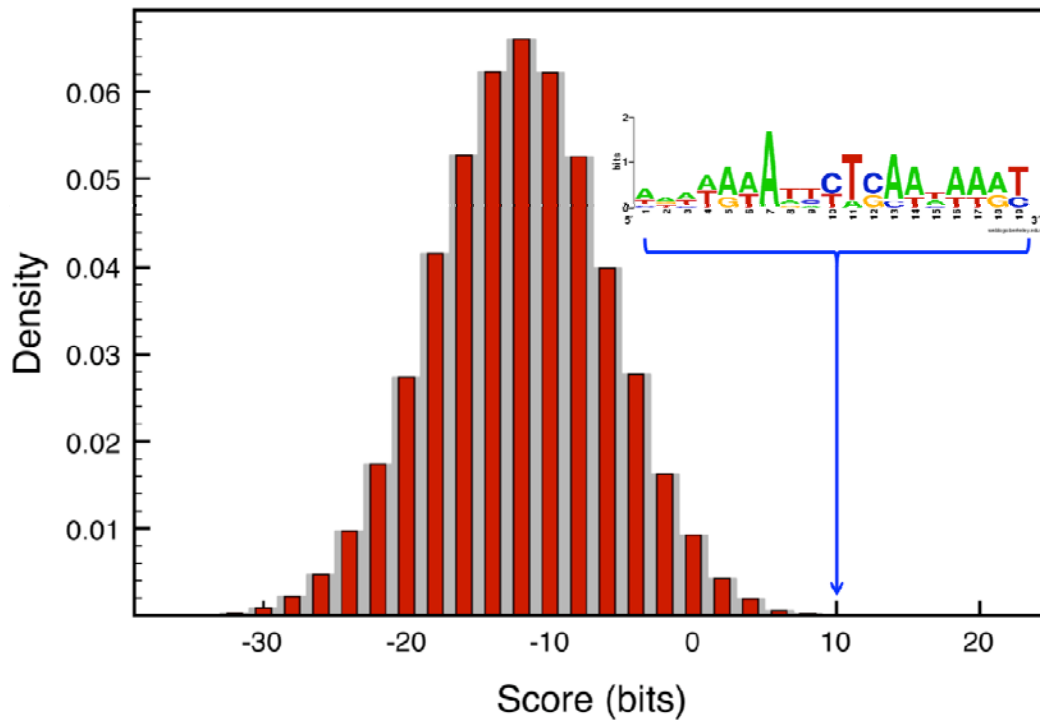

**Figure S1.** Benchmarking test in order to verify the reliability of the FurA weight-matrix to discern cognate and non-cognate binding sites. The matrix generated was used to scan all the non-coding sequences lying between two consecutive convergent genes found in the *Anabaena* sp. PCC 7120 genome. The scores resulting from this analysis are represented as a density histogram with a mean value around -11 bits. With a score range between -41.7 and 17.2 bits, the matrix scored unrelated sequences displaced towards negative values, while binding sites experimentally recognized by FurA scored at higher values, close to the matrix maximum score. The logo of the matrix used to scan the sequences was created with the WebLogo server (<http://weblogo.berkeley.edu/>), and it is included in the figure. The score value used as cutoff in the subsequent scanning of the *Anabaena* sp. PCC 7120 genome (10 bits) is highlighted. For this cutoff value, the  $\phi$ -value calculated parametrically for the score distribution histogram of sequences between convergent genes was  $7.43 \cdot 10^{-5}$  for a significance value of 0.01%.

**A**

| Bacterial species                 | Fur box consensus               | bp | Homology to FurA box |
|-----------------------------------|---------------------------------|----|----------------------|
| <i>Anabaena</i> sp. PCC 7120 FurA | -----AAATAAATTCTCAATAAAT-----   | 19 |                      |
| <i>Anabaena</i> sp. PCC 7120 FurB | -----AATAATGATAATTATTATCAATAAA  | 25 | (68.42)              |
| <i>Mycobacterium tuberculosis</i> | CATATTGAAAATCATTTTCATCAAAC----- | 26 | (68.42)              |
| <i>Vibrio cholerae</i>            | -----GATAATGATAATAATTATC-----   | 19 | (63.16)              |
| <i>Bacillus subtilis</i> Fur      | -----TGATAATNATTATCA-----       | 15 | (60.00)              |
| <i>Escherichia coli</i>           | -----GATAATGATAATCATTATC-----   | 19 | (57.89)              |
| <i>Pseudomonas aeruginosa</i>     | -----GATAATGATAATCATTATC-----   | 19 | (57.89)              |
| <i>Neisseria gonorrhoeae</i>      | -----AAAATTTATAATTTTAAAC-----   | 19 | (57.89)              |
| <i>Bacillus subtilis</i> PerR     | -----TTATAATNATTATAA-----       | 15 | (53.33)              |
| <i>Campylobacter jejuni</i>       | -----TATTTTGATAATTATTATCA-----  | 20 | (52.63)              |
| <i>Neisseria meningitidis</i>     | -----GATAATATAATAATTATCTTT---   | 21 | (52.63)              |

**B**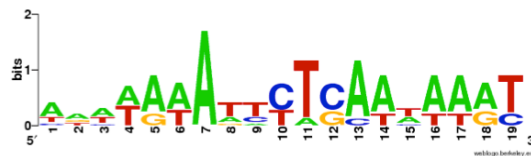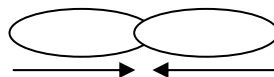

AAATAAATTCTCAATAAAT consensus  
 ATAAATATTCTCAATAAGC *furA1*  
 TGTTATATTCTCAATTAAC *furA2*  
 ATATAAATTCTCATCAAAT *ho1*  
 AATAGAAATCAGAAAATGT *hemC*  
 CAAAATAGTCTCAATAAAT *isiB*  
 AAAAGTATTCTCAAGATAT *znuA*  
 AGAAATATCCTGATTATAT *psaK*  
 ATTAAAAACCACCAAAAAT *hutA2*  
 ATATAAATAGTCAATAAGT *all1127*  
 AAAAAAATACTCAATATGT *all1804*  
 AAAAATATACTGAAATTGC *all3903*  
 AATTAAATTCAGAATTAAT *alr4585*  
 ATTAAATTTCTGATTAAT *all4246*  
 CTAAATAATCTCATTTAGT *alr0190*

**Figure S2.** The *Anabaena* sp. PCC 7120 FurA regulatory consensus sequence. (A) Sequence homology of the *Anabaena* 19-bp FurA box consensus with Fur binding consensus sequences from other eubacteria. (B) Proposed model for the FurA-DNA interaction, representing that at least two FurA monomers (shown as ovals) bind inverted heptamers (shown as arrows) within the 19-bp consensus. The model 7-1-7 of interaction to several naturally occurring FurA boxes are also indicated.
